# Supplementary material
Source: PubMed Central journal article supplement (PMC5149108)
Supplement: NIHMS830086-supplement-7.pdf [file NIHMS830086-supplement-7.pdf]

Figure S7, Related to Discussion

**A Aromatic residues in LCD**

```
1 msksespkep eqlrklfigg lsfettdesl rshfeqwgtl tdcvvrmdpn tkrsrgfgfv
61 tyatveevda amnarphkvd grvvepkrav sredsqrpga hltvkkifvg gikedteehh
121 lrdyfeqygk ievieimtdr gsgkkrgfaf vtfddhdsvd kiviqkyhtv nghncevrka
181 lskqemasas ssqrgrrsgsg nfgggrrggf ggndnfgrrg nfgsrggfgg srggggyggs
241 gdgyngfgnd gsnfggggsy ndfgnynnqs snfgpmkggg fggrrssgpyg gggqyfakpr
301 nqggyggsss sssygsgrrrf
```

**B Charged residues in LCD**

```
1 msksespkep eqlrklfigg lsfettdesl rshfeqwgtl tdcvvrmdpn tkrsrgfgfv
61 tyatveevda amnarphkvd grvvepkrav sredsqrpga hltvkkifvg gikedteehh
121 lrdyfeqygk ievieimtdr gsgkkrgfaf vtfddhdsvd kiviqkyhtv nghncevrka
181 lskqemasas ssqrgrrsgsg nfgggrrggf ggndnfgrrg nfgsrggfgg srggggyggs
241 gdgyngfgnd gsnfggggsy ndfgnynnqs snfgpmkggg fggrrssgpyg gggqyfakpr
301 nqggyggsss sssygsgrrrf
```
