# Supplementary material
Source: PubMed Central journal article supplement (PMC5149108)

Figure S1, Related to Experimental Procedures

**A**

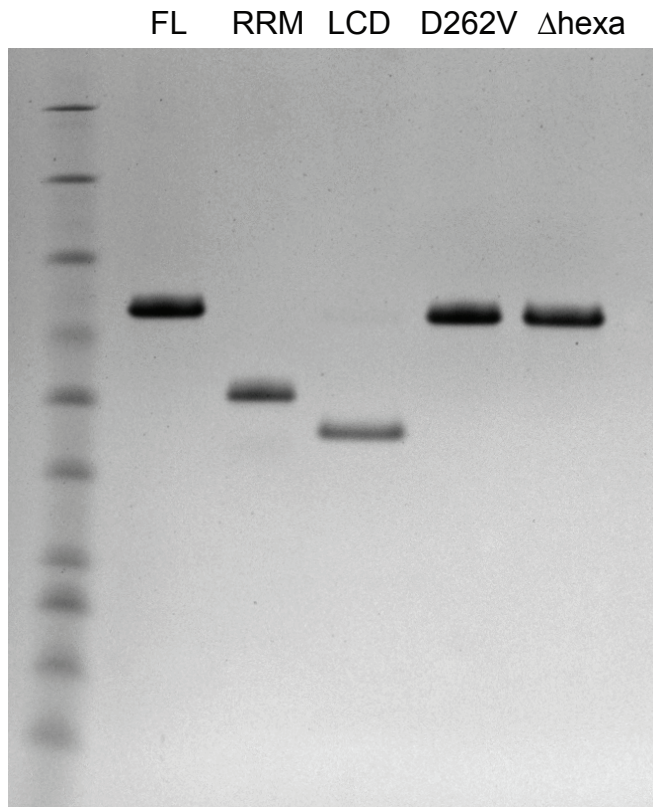

**B**

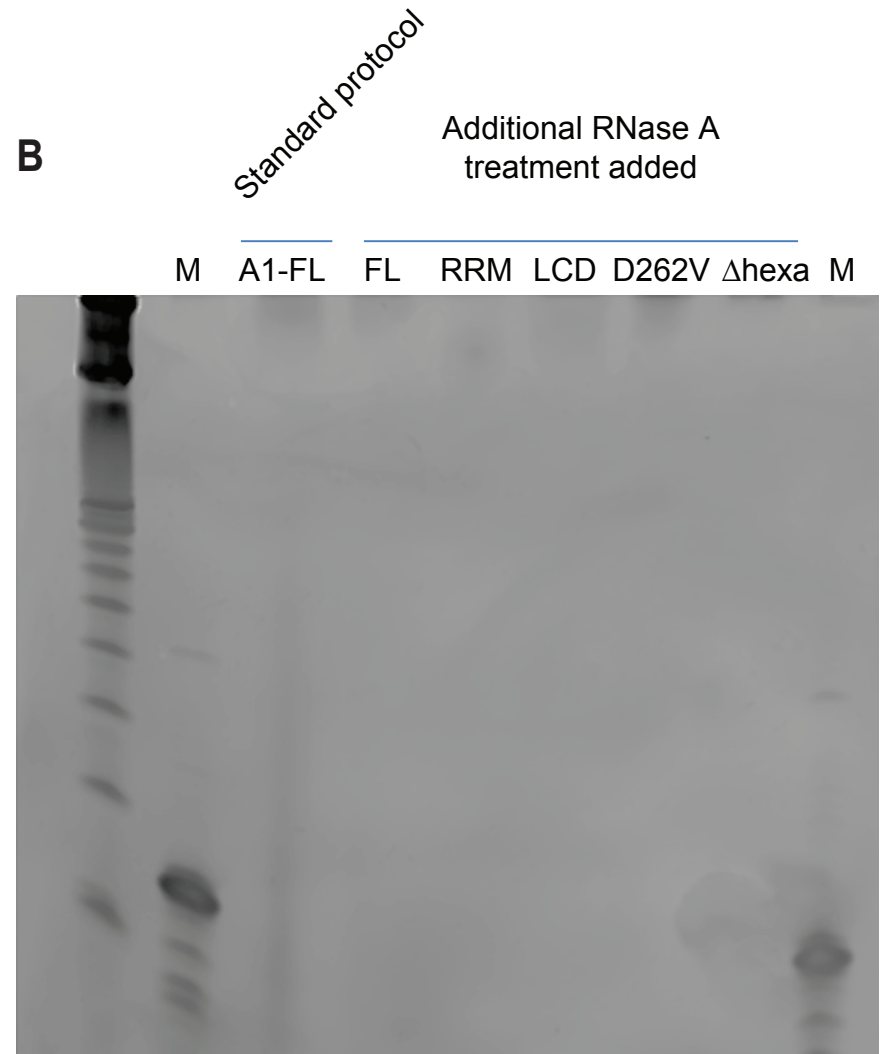

Supplement: NIHMS830086-supplement-1.pdf [file NIHMS830086-supplement-1.pdf]

Figure S2, Related to Figure 1

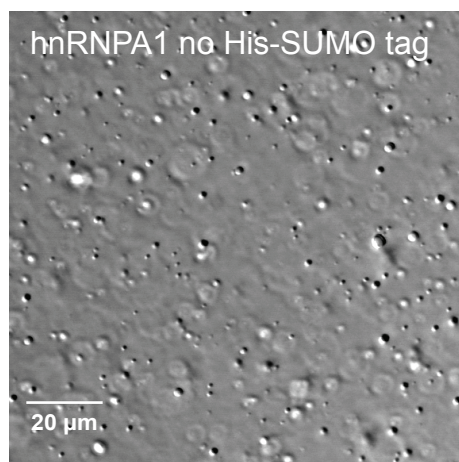

Supplement: NIHMS830086-supplement-2.pdf [file NIHMS830086-supplement-2.pdf]

Figure S3, Related to Figure 2

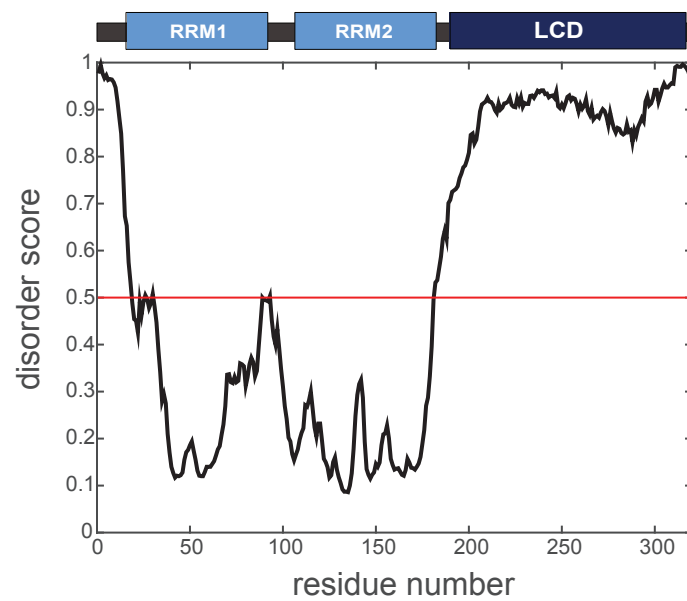

Supplement: NIHMS830086-supplement-3.pdf [file NIHMS830086-supplement-3.pdf]

Figure S4, Related to Figure 3

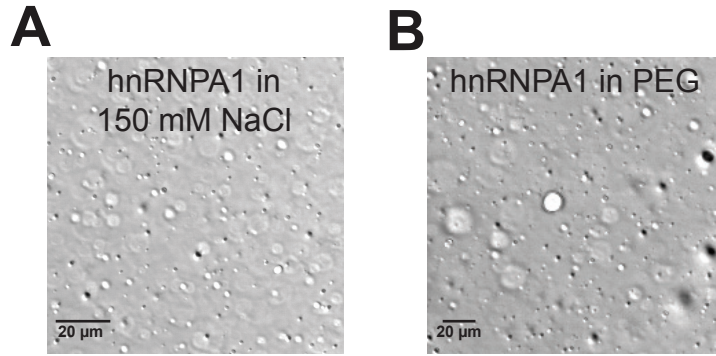

Supplement: NIHMS830086-supplement-4.pdf [file NIHMS830086-supplement-4.pdf]

Figure S5, Related to Figure 3

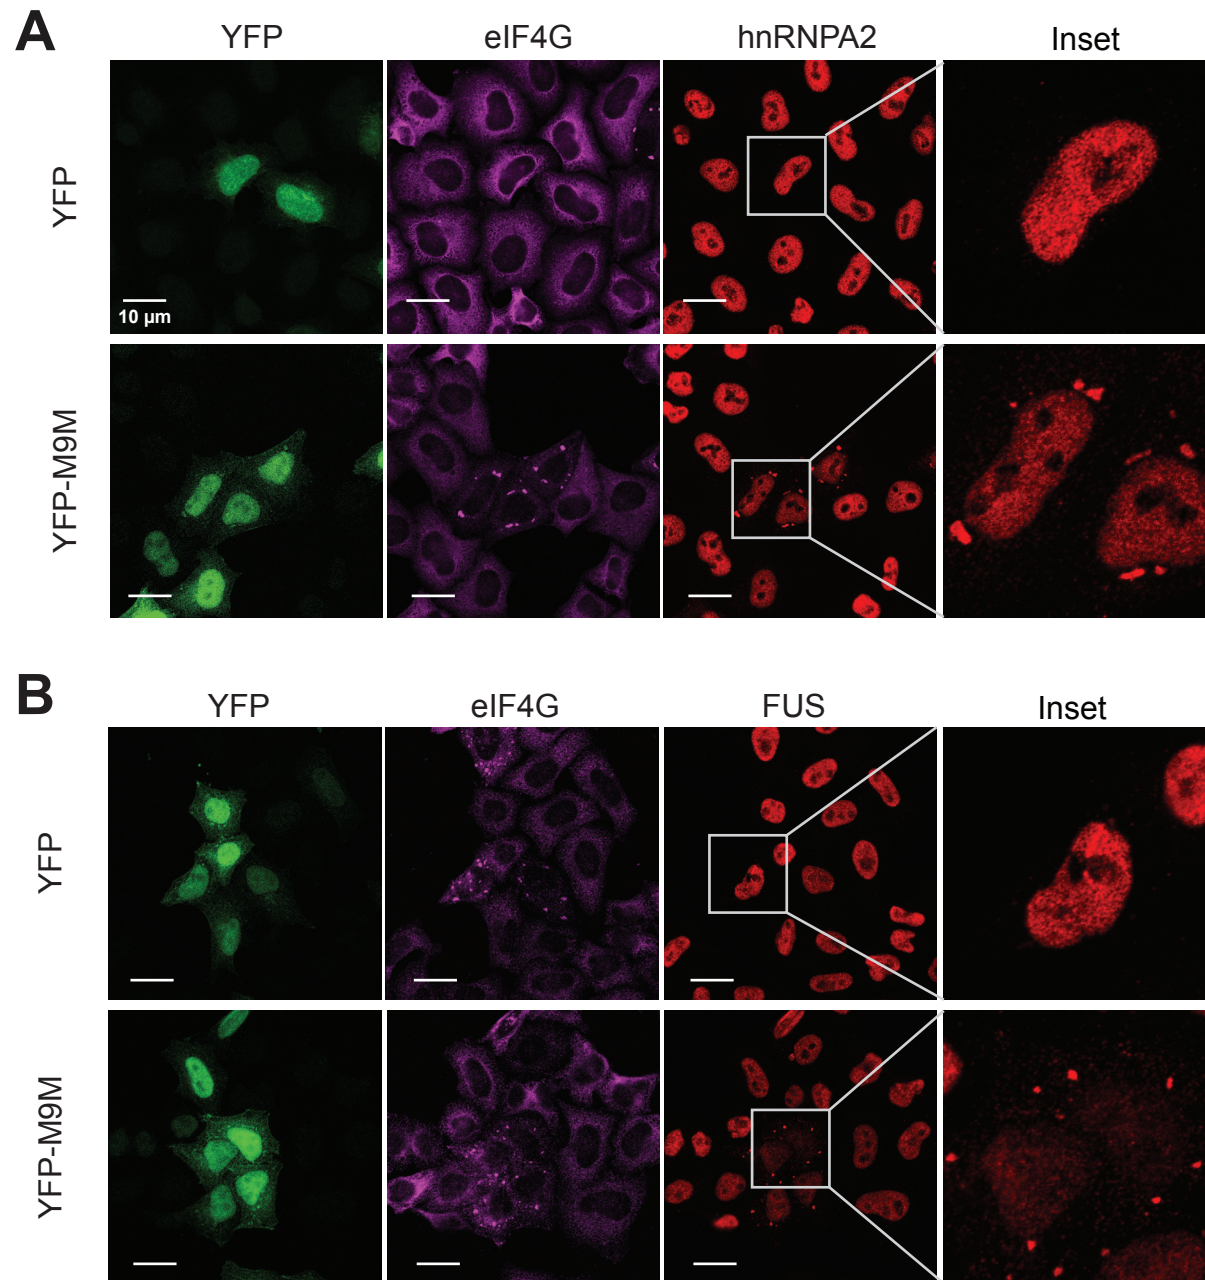

Supplement: NIHMS830086-supplement-5.pdf [file NIHMS830086-supplement-5.pdf]

Figure S6, Related to Figure 6

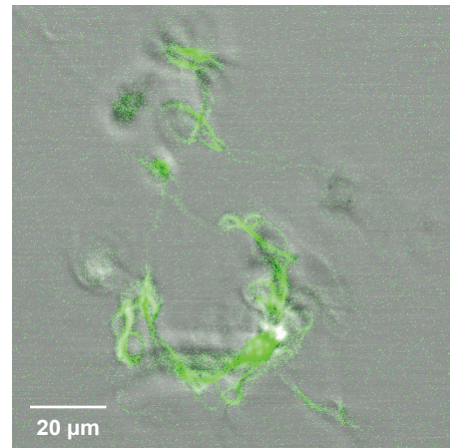

Supplement: NIHMS830086-supplement-6.pdf [file NIHMS830086-supplement-6.pdf]
